# Supplementary material for: Defensive Responses of Tea Plants (Camellia sinensis) Against Tea Green Leafhopper Attack: A Multi-Omics Study
Source: PubMed Central journal article supplement (PMC6978701; doi:10.3389/fpls.2019.01705), 2020-01-17
Supplement: DataSheet_1.pdf [file DataSheet_1.pdf]

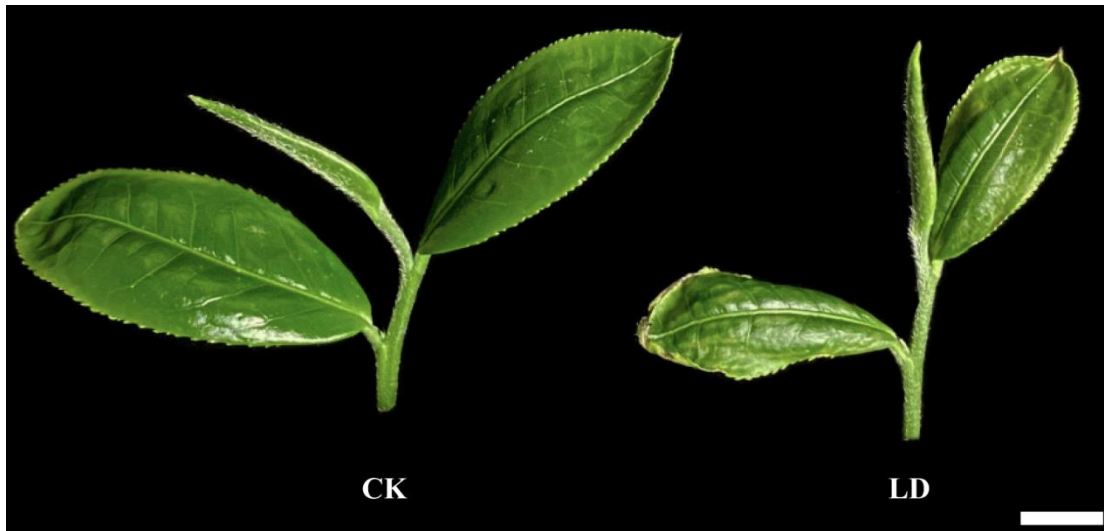

**Supplemental Figure S1.** Leaf phenotypes of green-leafhopper damaged (LD) tea leaves and undamaged tea leaves (CK). Bar, 1 cm.

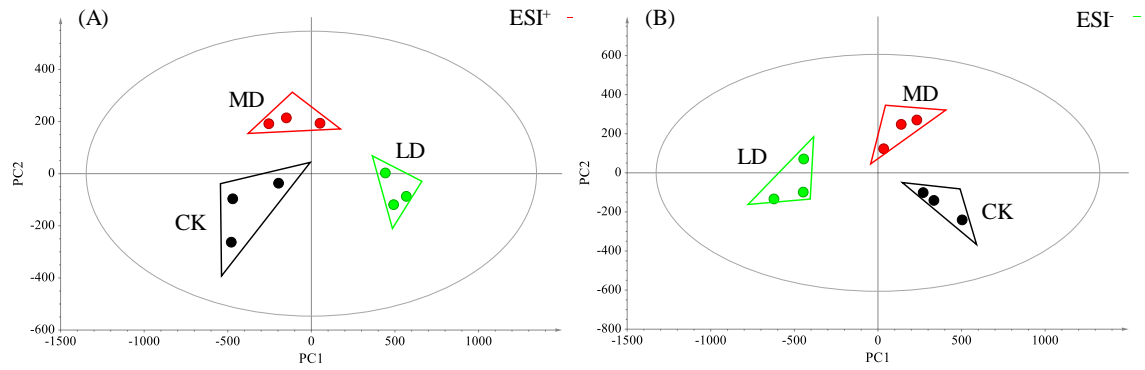

**Supplemental Figure S2.** PLS-DA analysis of tea leaves exposed to green leafhopper attack and mechanical damage. (A) PLS-DA score plot for tea samples based on 2,381 molecular features detected in ESI<sup>+</sup>. (B) PLS-DA score plot for tea samples based on 906 molecular features detected in ESI<sup>-</sup>. LD, tea green leafhopper-infested leaves. MD, mechanically damaged leaves. CK, undamaged control.

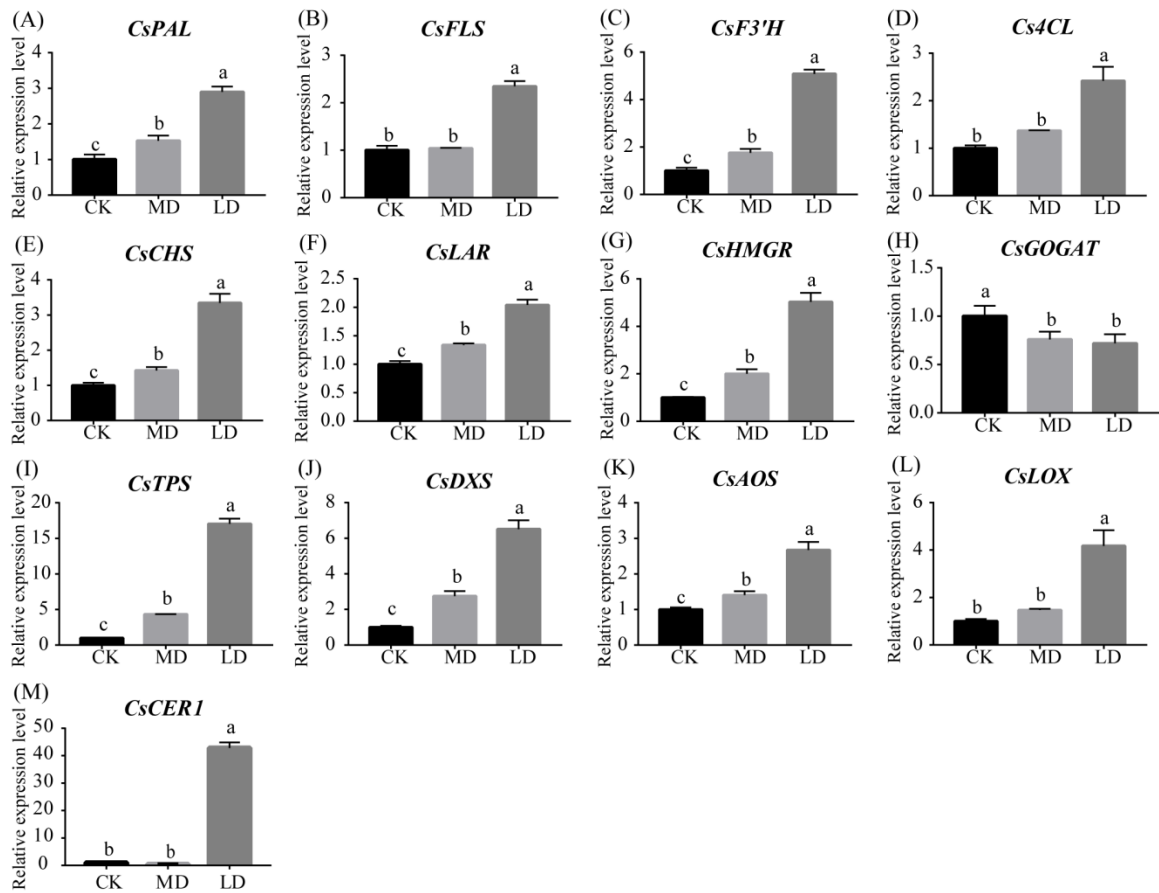

**Supplemental Figure S3.** Verification of the relative gene expression levels of selected genes by quantitative RT-PCR (qRT-PCR). (A) *PAL*, phenylalanine ammonia-lyase. (B) *FLS*, flavonol synthase. (C) *F3'H*, flavonoid 3'-hydroxylase. (D) *4CL*, 4-coumarate-CoA ligase. (E) *CHS*, chalcone synthase. (F) *LAR*, leucocyanidin reductase. (G) *HMGR*, 3-hydroxy-3-methyl-glutaryl-CoA reductase. (H) *GOGAT*, glutamate synthase. (I) *TPS*, terpene synthase. (J) *DXS*, 1-deoxy-D-xylulose 5-phosphate synthase. (K) *AOS*, allene oxide synthase. (L) *LOX*, lipoxygenase. (M) *CER1*, aldehyde decarbonylase. *GAPDH* (glyceraldehyde-3-phosphate dehydrogenase) gene was used as the internal control. Expression data are plotted as log<sub>2</sub> values. The expression of genes in CK is set to 1.0. Different letters on top of the column indicate significant difference ( $p < 0.05$ ) according to Tukey's HSD test. LD, tea green leafhopper-infested leaves. MD, mechanically damaged leaves. CK, undamaged control.

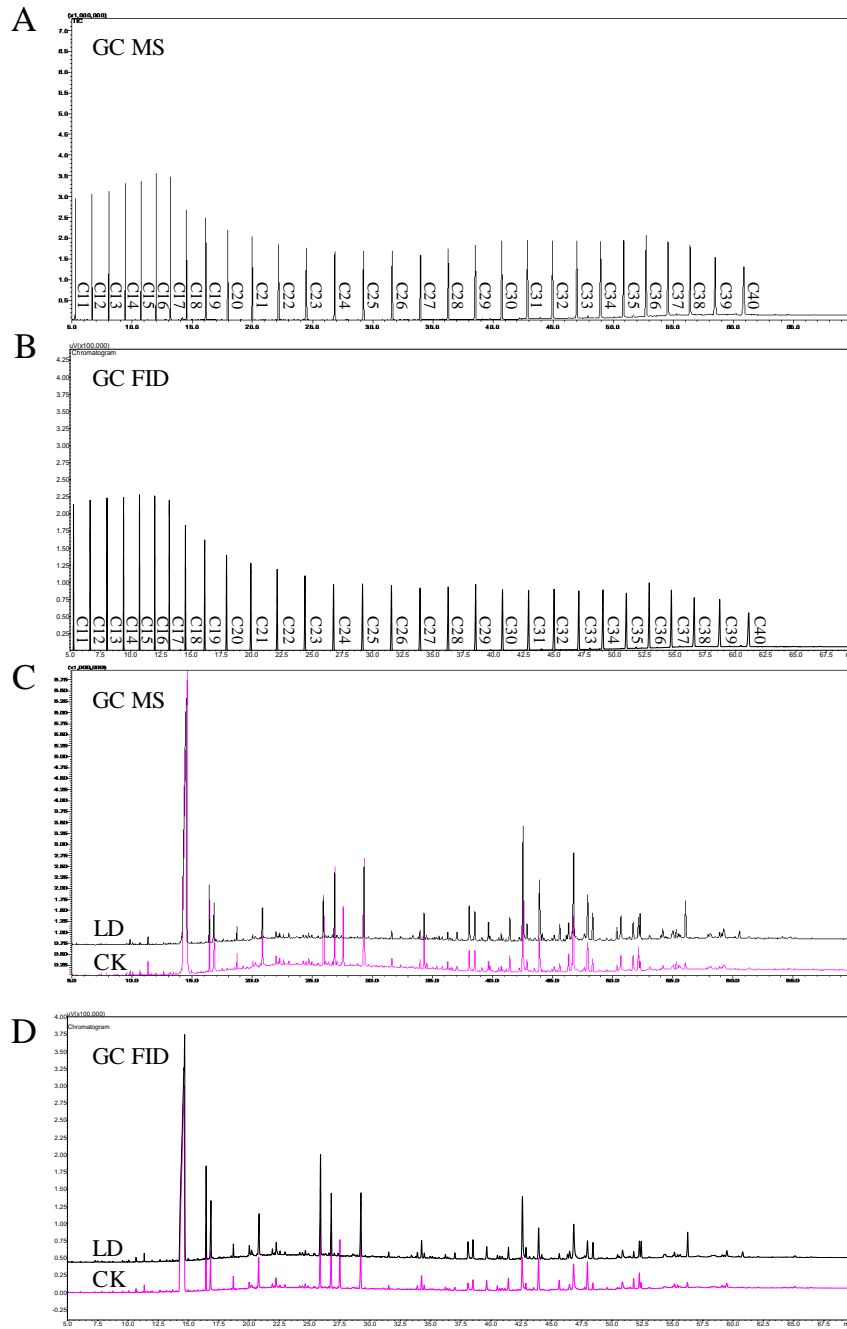

**Supplemental Figure S4.** Typical GC-MS (TIC) and GC-FID profiles for alkane standard mixtures (C10-C40) and representative samples. (A) GC-MS TIC chromatogram of mixed alkane standards. (B) GC-FID chromatogram profile of mixed alkane standards. (C) Overlaid GC-MS TIC chromatograms of cuticular wax components from CK and LD tea leaves. (D) Overlaid GC-FID chromatogram profiles of cuticular wax components from CK and LD tea leaves. LD, tea green leafhopper-infested leaves. CK, undamaged control.
