# Supplementary material for: Defensive Responses of Tea Plants (Camellia sinensis) Against Tea Green Leafhopper Attack: A Multi-Omics Study
Source: Front Plant Sci. 2020 Jan 17;10:1705. doi: 10.3389/fpls.2019.01705 (PMC6978701; doi:10.3389/fpls.2019.01705)
Supplement: Supplementary file 10 [file Table_9.xlsx]

## Sheet: Sheet1
Supplemental Table S9. Go enrichment of UP-regulated DEGs in LD vs MD comparison. Overrepresented BPs, MFs and CCs were identified based on a hypergeometric text with p-value<0.05. GO: Gene ontology. BPs, biological processes. MF, molecular functions. CC, cellular components.
Category	GO ID	Description	p-value	gene ID
BP	GO:0006073	cellular glucan metabolic process	1.88687e-05	TEA031623/TEA022251/TEA013222/TEA003410/TEA031639/TEA003764/TEA031643/TEA012314/TEA030973/TEA020209/TEA032146/TEA017941/TEA030594/TEA020743/TEA019644/TEA019643/TEA021184
BP	GO:0044042	glucan metabolic process	1.88687e-05	TEA031623/TEA022251/TEA013222/TEA003410/TEA031639/TEA003764/TEA031643/TEA012314/TEA030973/TEA020209/TEA032146/TEA017941/TEA030594/TEA020743/TEA019644/TEA019643/TEA021184
BP	GO:0044264	cellular polysaccharide metabolic process	1.88687e-05	TEA031623/TEA022251/TEA013222/TEA003410/TEA031639/TEA003764/TEA031643/TEA012314/TEA030973/TEA020209/TEA032146/TEA017941/TEA030594/TEA020743/TEA019644/TEA019643/TEA021184
BP	GO:0044262	cellular carbohydrate metabolic process	5.24781e-05	TEA031623/TEA022251/TEA013222/TEA029129/TEA003410/TEA031639/TEA003764/TEA031643/TEA012314/TEA030973/TEA020209/TEA022449/TEA003316/TEA032146/TEA017941/TEA030594/TEA018449/TEA020743/TEA019644/TEA019643/TEA021184
BP	GO:0005976	polysaccharide metabolic process	7.72476e-05	TEA031623/TEA022251/TEA013222/TEA003410/TEA031639/TEA003764/TEA031643/TEA012314/TEA030973/TEA020209/TEA032146/TEA017941/TEA030594/TEA020743/TEA019644/TEA019643/TEA021184
BP	GO:0006633	fatty acid biosynthetic process	0.00027378	TEA023390/TEA020816/TEA005469/TEA016936/TEA005835/TEA016934/TEA023651/TEA009179/TEA009759
BP	GO:0008610	lipid biosynthetic process	0.00034392	TEA008365/TEA023390/TEA008367/TEA008876/TEA004204/TEA020816/TEA018068/TEA005469/TEA016936/TEA005835/TEA016934/TEA023651/TEA032831/TEA009179/TEA003898/TEA009759/TEA007157/TEA013883/TEA023731
BP	GO:1901136	carbohydrate derivative catabolic process	0.000453715	TEA019135/TEA023307/TEA020688/TEA007244/TEA031484/TEA030778/TEA016502
BP	GO:0006629	lipid metabolic process	0.000919962	TEA008365/TEA021525/TEA025821/TEA023390/TEA008367/TEA008876/TEA004204/TEA020816/TEA018068/TEA005603/TEA014600/TEA005469/TEA016936/TEA021198/TEA005835/TEA016934/TEA023651/TEA026315/TEA032831/TEA024230/TEA001193/TEA018685/TEA015704/TEA000441/TEA011942/TEA005574/TEA030352/TEA020120/TEA009179/TEA003898/TEA009759/TEA007157/TEA013883/TEA023731
BP	GO:0006631	fatty acid metabolic process	0.00136415	TEA023390/TEA020816/TEA005469/TEA016936/TEA005835/TEA016934/TEA023651/TEA015704/TEA009179/TEA009759
BP	GO:0072330	monocarboxylic acid biosynthetic process	0.00171432	TEA023390/TEA020816/TEA005469/TEA016936/TEA005835/TEA016934/TEA023651/TEA009179/TEA009759
BP	GO:0016567	protein ubiquitination	0.00275143	TEA008983/TEA033806/TEA031666/TEA022563/TEA023773/TEA029343/TEA017030/TEA024056/TEA018913/TEA033065/TEA005829
BP	GO:0032446	protein modification by small protein conjugation	0.00302684	TEA008983/TEA033806/TEA031666/TEA022563/TEA023773/TEA029343/TEA017030/TEA024056/TEA018913/TEA033065/TEA005829
BP	GO:0006022	aminoglycan metabolic process	0.004919	TEA019135/TEA023307/TEA020688/TEA007244/TEA031484
BP	GO:0006026	aminoglycan catabolic process	0.004919	TEA019135/TEA023307/TEA020688/TEA007244/TEA031484
BP	GO:0006030	chitin metabolic process	0.004919	TEA019135/TEA023307/TEA020688/TEA007244/TEA031484
BP	GO:0006032	chitin catabolic process	0.004919	TEA019135/TEA023307/TEA020688/TEA007244/TEA031484
BP	GO:0006040	amino sugar metabolic process	0.004919	TEA019135/TEA023307/TEA020688/TEA007244/TEA031484
BP	GO:0016998	cell wall macromolecule catabolic process	0.004919	TEA019135/TEA023307/TEA020688/TEA007244/TEA031484
BP	GO:0044036	cell wall macromolecule metabolic process	0.004919	TEA019135/TEA023307/TEA020688/TEA007244/TEA031484
BP	GO:0046348	amino sugar catabolic process	0.004919	TEA019135/TEA023307/TEA020688/TEA007244/TEA031484
BP	GO:1901071	glucosamine-containing compound metabolic process	0.004919	TEA019135/TEA023307/TEA020688/TEA007244/TEA031484
BP	GO:1901072	glucosamine-containing compound catabolic process	0.004919	TEA019135/TEA023307/TEA020688/TEA007244/TEA031484
BP	GO:0034637	cellular carbohydrate biosynthetic process	0.010493	TEA022251/TEA029129/TEA003410/TEA030973/TEA020209/TEA022449/TEA003316/TEA032146/TEA030594/TEA020743/TEA021184
BP	GO:1901565	organonitrogen compound catabolic process	0.0130139	TEA019135/TEA023307/TEA020688/TEA007244/TEA031484/TEA001487/TEA014026
BP	GO:0032787	monocarboxylic acid metabolic process	0.0147279	TEA023390/TEA020816/TEA005469/TEA025345/TEA016936/TEA005835/TEA016934/TEA003929/TEA023651/TEA018294/TEA015704/TEA009179/TEA009759/TEA028242
BP	GO:0000271	polysaccharide biosynthetic process	0.0214736	TEA022251/TEA003410/TEA030973/TEA020209/TEA032146/TEA030594/TEA020743/TEA021184
BP	GO:0009250	glucan biosynthetic process	0.0214736	TEA022251/TEA003410/TEA030973/TEA020209/TEA032146/TEA030594/TEA020743/TEA021184
BP	GO:0033692	cellular polysaccharide biosynthetic process	0.0214736	TEA022251/TEA003410/TEA030973/TEA020209/TEA032146/TEA030594/TEA020743/TEA021184
BP	GO:0051273	beta-glucan metabolic process	0.0214736	TEA022251/TEA003410/TEA030973/TEA020209/TEA032146/TEA030594/TEA020743/TEA021184
BP	GO:0051274	beta-glucan biosynthetic process	0.0214736	TEA022251/TEA003410/TEA030973/TEA020209/TEA032146/TEA030594/TEA020743/TEA021184
BP	GO:0030243	cellulose metabolic process	0.0230128	TEA022251/TEA003410/TEA030973/TEA020209/TEA032146/TEA030594/TEA021184
BP	GO:0030244	cellulose biosynthetic process	0.0230128	TEA022251/TEA003410/TEA030973/TEA020209/TEA032146/TEA030594/TEA021184
BP	GO:0033014	tetrapyrrole biosynthetic process	0.0258444	TEA005844/TEA031341/TEA030929/TEA020323
BP	GO:0044711	single-organism biosynthetic process	0.0335291	TEA008365/TEA022251/TEA023390/TEA008367/TEA008876/TEA029129/TEA003410/TEA004204/TEA020816/TEA018068/TEA030973/TEA005469/TEA020209/TEA016936/TEA005835/TEA016934/TEA023651/TEA032831/TEA022449/TEA003316/TEA032146/TEA030594/TEA001809/TEA020743/TEA009179/TEA003898/TEA030929/TEA009759/TEA007157/TEA013883/TEA020323/TEA023731/TEA021184
BP	GO:0016051	carbohydrate biosynthetic process	0.0342851	TEA022251/TEA029129/TEA003410/TEA030973/TEA020209/TEA022449/TEA003316/TEA032146/TEA030594/TEA020743/TEA021184
BP	GO:0044255	cellular lipid metabolic process	0.036705	TEA023390/TEA008876/TEA020816/TEA018068/TEA005469/TEA016936/TEA005835/TEA016934/TEA023651/TEA015704/TEA030352/TEA009179/TEA009759/TEA007157/TEA023731
BP	GO:0015711	organic anion transport	0.0410372	TEA029263/TEA018561/TEA031012/TEA025995/TEA030352/TEA013305
BP	GO:0015849	organic acid transport	0.0410372	TEA029263/TEA018561/TEA031012/TEA025995/TEA030352/TEA013305
BP	GO:0046942	carboxylic acid transport	0.0410372	TEA029263/TEA018561/TEA031012/TEA025995/TEA030352/TEA013305
CC	GO:0048046	apoplast	9.66255e-06	TEA031623/TEA013222/TEA031639/TEA003764/TEA031643/TEA012314/TEA017941/TEA019644/TEA019643
CC	GO:0005576	extracellular region	5.23587e-05	TEA031623/TEA013222/TEA031639/TEA003764/TEA031643/TEA012314/TEA017941/TEA019644/TEA019643
CC	GO:0071944	cell periphery	0.0159999	TEA031623/TEA024749/TEA013222/TEA031639/TEA003764/TEA031643/TEA012314/TEA005648/TEA017941/TEA028326/TEA020743/TEA019644/TEA019643/TEA009002
CC	GO:0005618	cell wall	0.0290922	TEA031623/TEA013222/TEA031639/TEA003764/TEA031643/TEA012314/TEA017941/TEA019644/TEA019643/TEA009002
CC	GO:0030312	external encapsulating structure	0.0290922	TEA031623/TEA013222/TEA031639/TEA003764/TEA031643/TEA012314/TEA017941/TEA019644/TEA019643/TEA009002
MF	GO:0016747	transferase activity, transferring acyl groups other than amino-acyl groups	1.09145e-10	TEA013165/TEA008414/TEA023390/TEA031065/TEA023494/TEA025768/TEA011408/TEA029054/TEA024566/TEA023501/TEA032903/TEA020816/TEA011664/TEA015695/TEA009923/TEA009926/TEA005469/TEA021771/TEA016936/TEA033580/TEA019450/TEA013411/TEA010128/TEA004978/TEA005835/TEA016934/TEA010126/TEA023651/TEA032893/TEA018187/TEA030909/TEA029099/TEA027258/TEA015906/TEA030004/TEA030910/TEA032135/TEA009179/TEA015810/TEA009759…
MF	GO:0016746	transferase activity, transferring acyl groups	3.92436e-10	TEA013165/TEA019813/TEA008414/TEA023390/TEA031065/TEA023494/TEA025768/TEA011408/TEA029054/TEA024566/TEA023501/TEA032903/TEA020816/TEA011664/TEA015695/TEA009923/TEA009926/TEA005469/TEA021771/TEA016936/TEA033580/TEA019450/TEA013411/TEA010128/TEA004978/TEA005835/TEA016934/TEA010126/TEA023651/TEA001487/TEA032893/TEA018187/TEA030909/TEA029099/TEA027258/TEA015906/TEA030004/TEA030910/TEA015647/TEA032135…
MF	GO:0001071	nucleic acid binding transcription factor activity	2.87575e-09	TEA026703/TEA015323/TEA031249/TEA004127/TEA008318/TEA010431/TEA001604/TEA007197/TEA027058/TEA016430/TEA007969/TEA031299/TEA029100/TEA005334/TEA019152/TEA004324/TEA005213/TEA004420/TEA020191/TEA002467/TEA010811/TEA013996/TEA001387/TEA006402/TEA028505/TEA031948/TEA020545/TEA011154/TEA028649/TEA001484/TEA008513/TEA024135/TEA013830/TEA007370/TEA010420/TEA018496/TEA028473/TEA028249/TEA011053/TEA005735…
MF	GO:0003700	transcription factor activity, sequence-specific DNA binding	2.87575e-09	TEA026703/TEA015323/TEA031249/TEA004127/TEA008318/TEA010431/TEA001604/TEA007197/TEA027058/TEA016430/TEA007969/TEA031299/TEA029100/TEA005334/TEA019152/TEA004324/TEA005213/TEA004420/TEA020191/TEA002467/TEA010811/TEA013996/TEA001387/TEA006402/TEA028505/TEA031948/TEA020545/TEA011154/TEA028649/TEA001484/TEA008513/TEA024135/TEA013830/TEA007370/TEA010420/TEA018496/TEA028473/TEA028249/TEA011053/TEA005735…
MF	GO:0043565	sequence-specific DNA binding	1.27478e-07	TEA008318/TEA007197/TEA027058/TEA007969/TEA031299/TEA029100/TEA005334/TEA005213/TEA020191/TEA002467/TEA028505/TEA031948/TEA020545/TEA011154/TEA001484/TEA008513/TEA007370/TEA018496/TEA028473/TEA028249/TEA026188/TEA033820/TEA027083/TEA027171/TEA012360/TEA032033/TEA014681/TEA015988
MF	GO:0005509	calcium ion binding	2.35689e-06	TEA021090/TEA013148/TEA030740/TEA002789/TEA007881/TEA021782/TEA026895/TEA018857/TEA001304/TEA016507/TEA012466/TEA009969/TEA023422/TEA006621/TEA001306/TEA001817/TEA006407/TEA018321/TEA024220/TEA028477/TEA027737/TEA019257/TEA012947/TEA003470/TEA011744/TEA014324/TEA017096
MF	GO:0016762	xyloglucan:xyloglucosyl transferase activity	3.99903e-05	TEA031623/TEA013222/TEA031639/TEA003764/TEA031643/TEA012314/TEA017941/TEA019644/TEA019643
MF	GO:0005507	copper ion binding	8.90148e-05	TEA031563/TEA020236/TEA033818/TEA018659/TEA032099/TEA006738/TEA025908/TEA027671/TEA031895/TEA032959/TEA014545/TEA016939/TEA006731/TEA028726/TEA022776
MF	GO:0000287	magnesium ion binding	0.000500619	TEA033306/TEA031095/TEA005162/TEA016700/TEA004822/TEA025345/TEA003929/TEA007191/TEA004657/TEA031969/TEA031966/TEA029356/TEA000496/TEA014989/TEA010228/TEA028242
MF	GO:0005516	calmodulin binding	0.000646536	TEA022753/TEA026012/TEA019924/TEA017189/TEA004410/TEA024796/TEA028721/TEA015453
MF	GO:0010333	terpene synthase activity	0.000729169	TEA033306/TEA031095/TEA005162/TEA016700/TEA004822/TEA007191/TEA004657/TEA031969/TEA031966/TEA029356/TEA000496/TEA014989
MF	GO:0016838	carbon-oxygen lyase activity, acting on phosphates	0.000990706	TEA033306/TEA031095/TEA005162/TEA016700/TEA004822/TEA007191/TEA004657/TEA031969/TEA031966/TEA029356/TEA000496/TEA014989
MF	GO:0008061	chitin binding	0.00121753	TEA019135/TEA023307/TEA020688/TEA007244
MF	GO:0033926	glycopeptide alpha-N-acetylgalactosaminidase activity	0.00329958	TEA008370/TEA011405/TEA024373/TEA025611
MF	GO:0004568	chitinase activity	0.00372892	TEA019135/TEA023307/TEA020688/TEA007244/TEA031484
MF	GO:0004842	ubiquitin-protein transferase activity	0.00715686	TEA008983/TEA033806/TEA031666/TEA022563/TEA023773/TEA029343/TEA017030/TEA024056/TEA018913/TEA033065/TEA005829
MF	GO:0019787	ubiquitin-like protein transferase activity	0.00715686	TEA008983/TEA033806/TEA031666/TEA022563/TEA023773/TEA029343/TEA017030/TEA024056/TEA018913/TEA033065/TEA005829
MF	GO:0046983	protein dimerization activity	0.00755612	TEA022030/TEA017105/TEA025381/TEA019335/TEA009147/TEA030137/TEA031176/TEA013874/TEA009193/TEA001971/TEA000833/TEA029661/TEA016380/TEA030419/TEA027511/TEA016544/TEA032511/TEA011688/TEA022718/TEA026466/TEA019380/TEA031113/TEA010594/TEA025744/TEA026755/TEA004909/TEA004276/TEA019115/TEA012449
MF	GO:0016835	carbon-oxygen lyase activity	0.0122758	TEA033306/TEA031095/TEA005162/TEA016700/TEA023838/TEA004822/TEA007191/TEA004657/TEA031969/TEA031966/TEA029356/TEA000496/TEA014989
MF	GO:0046982	protein heterodimerization activity	0.0124327	TEA029661/TEA016544/TEA032511/TEA031113/TEA010594/TEA026755/TEA004909/TEA004276/TEA019115
MF	GO:0016798	hydrolase activity, acting on glycosyl bonds	0.0153841	TEA005161/TEA031623/TEA013222/TEA020172/TEA026882/TEA031639/TEA019135/TEA003764/TEA031643/TEA012314/TEA024075/TEA023307/TEA008370/TEA011405/TEA020688/TEA007244/TEA031484/TEA031308/TEA029877/TEA024373/TEA017828/TEA004469/TEA017941/TEA025611/TEA011905/TEA016295/TEA033635/TEA019644/TEA002704/TEA022060/TEA019643/TEA016597
MF	GO:0004553	hydrolase activity, hydrolyzing O-glycosyl compounds	0.01724	TEA031623/TEA013222/TEA026882/TEA031639/TEA019135/TEA003764/TEA031643/TEA012314/TEA024075/TEA023307/TEA008370/TEA011405/TEA020688/TEA007244/TEA031484/TEA031308/TEA029877/TEA024373/TEA017828/TEA004469/TEA017941/TEA025611/TEA011905/TEA016295/TEA033635/TEA019644/TEA002704/TEA022060/TEA019643/TEA016597
MF	GO:0016671	oxidoreductase activity, acting on a sulfur group of donors, disulfide as acceptor	0.0206766	TEA008738/TEA005399/TEA028968
MF	GO:0004888	transmembrane signaling receptor activity	0.0277268	TEA010156/TEA015209/TEA014867/TEA024970
MF	GO:0004970	ionotropic glutamate receptor activity	0.0277268	TEA010156/TEA015209/TEA014867/TEA024970
MF	GO:0005230	extracellular ligand-gated ion channel activity	0.0277268	TEA010156/TEA015209/TEA014867/TEA024970
MF	GO:0008066	glutamate receptor activity	0.0277268	TEA010156/TEA015209/TEA014867/TEA024970
MF	GO:0015276	ligand-gated ion channel activity	0.0277268	TEA010156/TEA015209/TEA014867/TEA024970
MF	GO:0022824	transmitter-gated ion channel activity	0.0277268	TEA010156/TEA015209/TEA014867/TEA024970
MF	GO:0022834	ligand-gated channel activity	0.0277268	TEA010156/TEA015209/TEA014867/TEA024970
MF	GO:0022835	transmitter-gated channel activity	0.0277268	TEA010156/TEA015209/TEA014867/TEA024970
MF	GO:0030594	neurotransmitter receptor activity	0.0277268	TEA010156/TEA015209/TEA014867/TEA024970
MF	GO:0099600	transmembrane receptor activity	0.0277268	TEA010156/TEA015209/TEA014867/TEA024970
MF	GO:0016759	cellulose synthase activity	0.0287301	TEA022251/TEA003410/TEA030973/TEA020209/TEA032146/TEA021184
MF	GO:0016760	cellulose synthase (UDP-forming) activity	0.0287301	TEA022251/TEA003410/TEA030973/TEA020209/TEA032146/TEA021184
MF	GO:0016829	lyase activity	0.0491485	TEA033306/TEA031095/TEA026101/TEA005162/TEA016700/TEA023838/TEA004822/TEA007191/TEA004657/TEA031969/TEA031966/TEA005656/TEA029356/TEA001809/TEA000496/TEA030929/TEA014989/TEA020323
