# Supplementary material for: Defensive Responses of Tea Plants (Camellia sinensis) Against Tea Green Leafhopper Attack: A Multi-Omics Study
Source: Front Plant Sci. 2020 Jan 17;10:1705. doi: 10.3389/fpls.2019.01705 (PMC6978701; doi:10.3389/fpls.2019.01705)
Supplement: Supplementary file 13 [file Table_12.xlsx]

## Sheet: CK
Supplemental Table S12. (A) Cuticular wax composition analysis of CK leaves
CK1	Peak#	RT (min)	Area	Compound	CK2	Peak#	RT (min)	Area	Compound	CK3	Peak#	RT (min)	Area	Compound
	1	5.054	1155.5			1	5.333	1109.7	C11 Alkane		1	5.054	2352.4
	2	5.333	1981.5	C11 Alkane		2	6.477	1256.6			2	5.333	1202.4	C11 Alkane
	3	5.408	1030.3			3	6.636	1038			3	5.479	2304
	4	5.494	1006.7			4	7.265	2127.4	Fatty acids		4	6.071	2927.8
	5	5.992	1377.8			5	7.462	9027.7			5	6.48	1165.9
	6	6.476	2547.3			6	7.829	2759			6	6.634	1128.2
	7	7.267	3502.3	Fatty acids		7	8.149	1104.9	C13 Alkane		7	7.267	3424.4	Fatty acids
	8	7.466	7600.3			8	8.449	2708.6			8	7.482	1672.4
	9	7.83	4378.3			9	9.547	4072			9	7.715	4924.6
	10	7.949	1177.4			10	9.657	2083.3	Ester		10	7.83	3959.7
	11	8.037	1700.5	C13 Alkane		11	9.862	1442.6			11	7.946	1367.6
	12	8.148	1833.9			12	10.045	6835.1	Fatty acidsEster		12	8.035	1330.1	C13 Alkane
	13	8.449	3652.4			13	10.575	1655.1			13	8.149	1387.8
	14	8.581	1151.3			14	10.651	11978.7			14	8.448	2506.5
	15	9.41	1133.4			15	10.717	1267.4	C15 Alkane		15	8.628	1121.5
	16	9.548	4212.3	Ester		16	10.761	3101.8			16	8.757	4257.3
	17	9.659	2804.6			17	10.952	1132.1			17	8.86	1048.1
	18	9.857	2363.1			18	11.09	1051.6			18	9.253	1462
	19	10.045	7299.1	Fatty acidsEster		19	11.219	2289.5	Fatty acids		19	9.411	1303.4
	20	10.454	1177			20	11.266	1214			20	9.547	4651.6	Ester
	21	10.575	2207.3			21	11.33	23275	Fatty acidsEster		21	9.688	1855.5
	22	10.652	13756.4			22	11.448	2219.2			22	9.857	2337.3
	23	10.717	1601.4	C15 Alkane		23	11.554	1608.2			23	10.044	7243.6	Fatty acidsEster
	24	10.761	4492.6			24	11.612	2425.3			24	10.248	1238.8
	25	10.884	1471.4			25	11.706	1304.3			25	10.453	1152.3
	26	10.954	1633.6			26	11.765	1202.5			26	10.575	2032.5
	27	11.089	1561			27	11.854	2439			27	10.651	11990
	28	11.219	3003.5	Fatty acids		28	11.915	2266.6			28	10.717	1803.8	C15 Alkane
	29	11.265	1791			29	11.976	5193.6			29	10.761	2371.4
	30	11.331	24432.6	Fatty acidsEster		30	12.073	2456.4			30	10.81	1001
	31	11.448	2875			31	12.186	1994			31	10.887	1166
	32	11.557	1926.6			32	12.325	1515.2			32	10.951	1534.3
	33	11.608	3862			33	12.464	2950.8			33	11.09	1618.1
	34	11.723	1847.3			34	12.542	2542.8			34	11.218	2613.4	Fatty acids
	35	11.767	1519.5			35	12.63	10512.4	Fatty acidsEster		35	11.265	2043
	36	11.857	3338.1			36	12.753	4712.9			36	11.331	22246	Fatty acidsEster
	37	11.915	2013.7			37	12.844	2190.1			37	11.448	2794.2
	38	11.977	5709.6			38	12.879	2830			38	11.552	1673.6
	39	12.073	2683.3			39	12.982	4413			39	11.606	4434.1
	40	12.196	2311.6			40	13.053	3162.4			40	11.718	1616.2
	41	12.322	1649.5			41	13.106	3332.8			41	11.766	1285.8
	42	12.467	3511.5			42	13.179	9297.4	C17 Alkane Alkane		42	11.854	2334.1
	43	12.542	2838.5			43	13.308	7299.7			43	11.915	2093.8
	44	12.631	10495.6	Fatty acidsEster		44	13.433	9608.4			44	11.977	5466.8
	45	12.751	5089.5			45	13.546	3813.7			45	12.085	2718.8
	46	12.835	3703.3			46	13.665	11777.1	Fatty acids		46	12.187	1743.7
	47	12.879	2894.5			47	13.776	6701.5			47	12.33	1343.6
	48	12.981	5201.5			48	13.87	6547			48	12.464	2737.3
	49	13.051	3395.2			49	13.982	14677.9			49	12.539	2477.3
	50	13.107	3374.3			50	14.117	6891.1			50	12.63	9668.6	Fatty acidsEster
	51	13.18	8841.1	C17 Alkane Alkane		51	14.472	2.21476e+06			51	12.753	4429.9
	52	13.306	7801.1			52	14.718	4287.7			52	12.833	3097.2
	53	13.433	11237.2			53	14.939	6938.3	Fatty acidsEster		53	12.877	2514.8
	54	13.546	3941.4			54	15.004	3449.9			54	12.978	4439.6
	55	13.667	14900.3	Fatty acids		55	15.249	1443.5			55	13.051	2606
	56	13.776	6586.3			56	15.447	3352.3			56	13.104	3374.8
	57	13.871	6904.9			57	15.512	1125.4			57	13.18	8456.3	C17 Alkane Alkane
	58	13.982	15346.9			58	15.647	2859			58	13.305	6043.9
	59	14.116	6166.9			59	15.748	5348.3			59	13.432	8975.1
	60	14.561	3.24513e+06			60	16.107	3721.5	C19 Alkane		60	13.546	3146.3
	61	14.723	16318.6			61	16.246	5571.4	Fatty acidsEster		61	13.665	12088.1	Fatty acids
	62	14.795	5328.9			62	16.427	257562	Ester		62	13.774	5579.9
	63	14.854	6000.1			63	16.549	12322.4			63	13.87	5789.9
	64	14.947	16315.5	Fatty acidsEster		64	16.655	20262			64	13.981	12998.6
	65	15.012	10655			65	16.821	680682	Fatty acids		65	14.116	4454
	66	15.08	6855.8			66	17.387	1838			66	14.641	4.83551e+06
	67	15.168	7094.3			67	17.471	6808.1			67	14.954	6823.1	Fatty acidsEster
	68	15.259	12691.8			68	17.629	1618.7			68	15.02	4081.8
	69	15.329	8629.8			69	17.74	2690.2			69	15.167	2118.5
	70	15.448	19661.7			70	17.912	5636.4			70	15.45	3446.1
	71	15.514	10212.9			71	17.975	1358.7			71	15.648	2706.3
	72	15.645	21351.5			72	18.096	1975.8			72	15.755	5631.1
	73	15.75	22365.7			73	18.217	3341.7			73	16.107	3469.1	C19 Alkane
	74	15.85	11717.9			74	18.293	1397.6			74	16.249	4874.4	Fatty acidsEster
	75	15.943	14049.1			75	18.5	62102.3			75	16.433	271719	Ester
	76	15.986	10505.2			76	18.603	15653.5			76	16.813	523224	Fatty acids
	77	16.107	26538.3	C19 Alkane		77	18.688	55778.7	Fatty acids		77	17.22	1146.1
	78	16.247	29874.3	Fatty acidsEster		78	18.824	42316.1			78	17.381	1850.9
	79	16.43	256389	Ester		79	18.935	41593.8			79	17.467	6603.4
	80	16.54	9392.7			80	19.079	44181.5			80	17.613	1957
	81	16.578	14408.7			81	19.185	28027.5			81	17.744	2915.1
	82	16.657	11465.7			82	19.281	46150	Ether		82	17.91	5885.5
	83	16.833	817606	Fatty acids		83	19.364	29071.3			83	17.987	1358.1
	84	17.385	1847.9			84	19.443	13009.2			84	18.091	2375.2
	85	17.473	6683.1			85	19.511	71055.3			85	18.221	4239.8
	86	17.626	2102.7			86	19.691	27912.3			86	18.288	1365.1
	87	17.744	2677.1			87	19.752	13332.1			87	18.496	48723.7
	88	17.914	5809.8			88	19.916	67902.4	C21 Alkane		88	18.691	102809	Fatty acids
	89	17.988	1252			89	20	115373			89	18.826	33333.3
	90	18.083	2516.6			90	20.187	179933			90	18.93	22532.2
	91	18.221	4465.1			91	20.494	41630.9			91	19.023	20436.9
	92	18.297	2228.8			92	20.65	62301.5			92	19.115	17971.3
	93	18.497	68700.6			93	20.799	328063	Fatty acids		93	19.192	22604.6
	94	18.694	123971	Fatty acids		94	21.008	55412.3			94	19.31	33269.8	Ether
	95	18.831	44948.3			95	21.07	38957.2			95	19.364	32543.7
	96	18.929	46181			96	21.172	47727			96	19.511	56569.9
	97	19.076	31137.6			97	21.294	54641.5			97	19.693	27829.6
	98	19.157	32541			98	21.415	40389.3			98	19.886	55560.7	C21 Alkane
	99	19.252	37156.4	Ether		99	21.518	55775			99	19.999	98548.7
	100	19.297	37948.2			100	21.638	58291			100	20.184	140734
	101	19.387	42050.6			101	21.72	30497.7			101	20.499	28242
	102	19.523	41973.4			102	21.801	31424.1			102	20.547	11987.1
	103	19.578	38849.2			103	21.916	101961	Fatty acids		103	20.642	48014.1
	104	19.716	34079.7			104	21.996	29507.8			104	20.789	265583	Fatty acids
	105	19.761	17128.9			105	22.097	60139			105	20.996	65585.9
	106	19.909	76174.7	C21 Alkane		106	22.23	220138	Fatty acidsEster		106	21.201	56592.1
	107	20.007	116474			107	22.458	20823.5			107	21.289	24774.3
	108	20.092	32427.8			108	22.549	96108.5			108	21.379	27442.3
	109	20.193	107470			109	22.658	16031.8			109	21.511	58286.6
	110	20.293	98363.1			110	22.72	32410.6			110	21.632	43710.8
	111	20.5	52794.1			111	22.779	51249.8			111	21.776	46285.1
	112	20.654	71143.5			112	22.973	105613	Fatty acids		112	21.913	82843.4	Fatty acids
	113	20.814	419126	Fatty acids		113	23.069	39502.2			113	22	22812.8
	114	21.004	103886			114	23.209	45515.7			114	22.092	50394
	115	21.163	25300.7			115	23.245	41527.4			115	22.223	172878	Fatty acidsEster
	116	21.196	47604.3			116	23.356	27907.5			116	22.458	16348.3
	117	21.29	34235.8			117	23.432	46898.6			117	22.546	78689
	118	21.38	40544			118	23.557	53452.2			118	22.711	44951.1
	119	21.526	88584.4			119	23.672	70155.9			119	22.806	23161.5
	120	21.622	59114.5			120	23.783	51895.2			120	22.86	14105.9
	121	21.697	14884.4			121	23.875	16537.4			121	22.962	110824	Fatty acids
	122	21.797	63636.4			122	23.945	29784.6			122	23.214	38444.6
	123	21.917	116381	Fatty acids		123	24.02	68245.5			123	23.256	16635.9
	124	22.003	36402.7			124	24.173	112622			124	23.311	22976.1
	125	22.097	68305.8			125	24.39	108855	C23 Alkane		125	23.421	50587
	126	22.239	260622	Fatty acidsEster		126	24.636	110358			126	23.555	34500.2
	127	22.472	24402.3			127	24.78	49416.7			127	23.67	52641.8
	128	22.556	116633			128	24.887	47337.1			128	23.785	50545.6
	129	22.708	50540.6			129	24.964	46184.6			129	23.934	24237.4
	130	22.8	56184.2			130	25.072	44255.8			130	23.979	20030.7
	131	22.874	26118			131	25.189	24491.5			131	24.032	35426.1
	132	22.966	133728	Fatty acids		132	25.252	22983			132	24.176	54180.7
	133	23.122	19511.4			133	25.35	61430.9			133	24.242	28430.8
	134	23.219	94990.3			134	25.454	60949.4			134	24.393	83586.3	C23 Alkane
	135	23.345	27172.3			135	25.549	14640.5			135	24.634	90177.9
	136	23.439	65742.9			136	25.602	43013.8			136	24.739	18491.9
	137	23.566	51610.5			137	25.706	24006.8			137	24.782	18548
	138	23.606	17273			138	25.886	642769			138	24.875	74357.4
	139	23.663	58113.5			139	26.016	53886.2			139	25.054	32719.4
	140	23.803	71448.8			140	26.114	47534.2			140	25.135	15819
	141	23.905	28835.3			141	26.289	143710			141	25.186	12712.5
	142	23.951	27158.9			142	26.579	82519	Fatty acids		142	25.344	65875.3
	143	24.003	25188.6			143	26.777	403797			143	25.443	52505.9
	144	24.041	42654.1			144	26.926	26184.4			144	25.624	46141.5
	145	24.177	94476.5			145	27.027	74690.8	Fatty acidsEster		145	25.872	439114
	146	24.267	31891.7			146	27.128	24150.8			146	26.021	41478.1
	147	24.396	117708	C23 Alkane		147	27.189	16088.4			147	26.123	33900.7
	148	24.525	13779.6			148	27.253	25072.8			148	26.283	63086.5
	149	24.642	113234			149	27.353	59353.9			149	26.359	40795.6
	150	24.793	59383			150	27.484	160449			150	26.581	71005.8	Fatty acids
	151	24.884	61679.1			151	27.624	12187.4	Ester		151	26.775	363331
	152	24.954	35703.5			152	27.67	22554.4			152	26.921	15128.8
	153	25.031	27234.1			153	27.726	18537			153	26.943	9563.2
	154	25.085	19963.4			154	27.826	36690			154	27.035	51239.9	Fatty acidsEster
	155	25.134	48145.4			155	27.866	34279.9			155	27.14	25818.4
	156	25.355	106508			156	28.028	39502.4			156	27.26	23810.5
	157	25.443	73614.2			157	28.123	48869.6			157	27.362	38240.7
	158	25.579	21579.7			158	28.193	13404.7			158	27.5	321891
	159	25.653	47723.1			159	28.248	46779.1			159	27.631	37429.9	Ester
	160	25.889	719620			160	28.39	40764.4			160	27.785	17746.5
	161	26.025	53064.2			161	28.535	92562.3			161	27.82	11622.9
	162	26.125	69660.7			162	28.699	38274	Primary alcohols		162	27.848	5159.2
	163	26.285	77779.4			163	28.809	37150.7			163	27.877	26309.6
	164	26.351	68146.9			164	28.931	55039.1			164	28.055	36984.9
	165	26.476	15253.9			165	29.038	10444.5			165	28.116	29267.5
	166	26.588	99564.1	Fatty acids		166	29.226	1.0352e+06	C25 Alkane		166	28.234	37165.4
	167	26.778	438944			167	29.571	5259			167	28.386	28059.3
	168	27.015	94995.3	Fatty acidsEster		168	29.896	1937.8			168	28.553	40402.6
	169	27.124	44141.8			169	30.046	5011			169	28.584	24401
	170	27.234	28412.4			170	30.178	2542.7			170	28.681	34908.6	Primary alcohols
	171	27.374	71571			171	30.236	6016.4			171	28.792	26710.5
	172	27.508	373035			172	30.352	1187.9			172	28.909	52956
	173	27.606	16271.9	Ester		173	30.395	1192.6			173	29.225	799840	C25 Alkane
	174	27.639	13953.1			174	30.537	2333			174	29.6	9918
	175	27.669	11878.7			175	30.678	5164.5			175	29.898	1068
	176	27.707	29416.1			176	30.788	1913.8			176	30.056	4681.9
	177	27.824	45857.4			177	30.901	2132.5			177	30.225	8967.8
	178	27.897	38732.7			178	31.024	3168.8			178	30.367	1514.5
	179	27.97	13051.4			179	31.145	1814.2			179	30.543	1070.7
	180	28.029	42250.6			180	31.532	74020.4			180	30.67	4495.4
	181	28.125	66059.4			181	31.642	10457.2			181	30.9	2230.4
	182	28.259	40002.7			182	31.69	14466.9			182	31.011	1329.8
	183	28.384	50091.8			183	31.743	13546.5			183	31.115	8075.9
	184	28.523	101354			184	31.81	17154.4	C26 aldehyde		184	31.529	60676.8
	185	28.702	51148.2	Primary alcohols		185	31.852	19888			185	31.675	7914.3
	186	28.828	40570			186	31.931	8007.1			186	31.711	10758.6
	187	28.932	79350.8			187	31.993	19339.3			187	31.809	37406.9	C26 aldehyde
	188	29.228	510796	C25 Alkane		188	32.043	12190.1			188	32.002	18691.9
	189	29.574	61729.2			189	32.099	18504.3			189	32.113	12854.2
	190	29.678	23959.2			190	32.253	27917.8			190	32.248	21189.8
	191	29.738	12602.6			191	32.294	32228.2			191	32.352	42516.2
	192	29.793	28250.9			192	32.426	23895			192	32.536	6664.3
	193	29.893	43772.3			193	32.535	15419.9			193	32.652	15976.2
	194	30.037	52575			194	32.586	14601.9			194	32.687	5112.5
	195	30.181	29176.4			195	32.681	17605.3			195	32.721	16202.2
	196	30.234	51161.2			196	32.718	24965			196	32.827	6330.3
	197	30.37	43556.4			197	32.927	41911.8			197	32.928	17920.1
	198	30.509	31232.4			198	33.061	31215.1			198	33.051	27535.2
	199	30.564	12284.8			199	33.176	21527.6			199	33.17	12988.8
	200	30.681	55652.2			200	33.249	24875.5			200	33.263	16754.3
	201	30.76	12088.1			201	33.388	35307	C26 alcohol		201	33.39	22544.2	C26 alcohol
	202	30.819	24038.9			202	33.62	44175.9			202	33.494	5237
	203	30.918	25610.1			203	33.747	21246.6			203	33.551	9692.2
	204	30.965	10551.8			204	33.897	55028.2	C27 Alkane		204	33.604	15621.3
	205	31.001	25915			205	34.008	6417.3			205	33.745	18210.9
	206	31.114	63055.7			206	34.066	13900.7			206	33.895	44354	C27 Alkane
	207	31.278	11004.3			207	34.116	7756.6			207	34.063	15691.7
	208	31.359	29602.5			208	34.247	131155	Fatty acidsEster		208	34.246	113682	Fatty acidsEster
	209	31.399	9790.8			209	34.364	8652.1			209	34.463	54025.1
	210	31.536	98733.4			210	34.465	62670.7			210	34.68	9131.2
	211	31.674	9495.2			211	34.678	34518			211	34.693	14143.1
	212	31.735	24982.3			212	34.81	6131			212	34.839	3289.9
	213	31.803	32165.6	C26 aldehyde		213	34.954	49043.8			213	34.966	29088.5
	214	31.904	14455.7			214	35.142	18993			214	35.128	19927.1
	215	31.953	14177.5			215	35.293	38789.4	Primary alcohols		215	35.298	19356.7	Primary alcohols
	216	32.006	23084.8			216	35.454	5372.2			216	35.376	6277
	217	32.106	21157.2			217	35.492	3891.1			217	35.487	9885.3
	218	32.245	33549.9			218	35.518	4500.2			218	35.618	8765.7
	219	32.325	39849.1			219	35.684	53552.7	Fatty acidsEster		219	35.683	21091.5	Fatty acidsEster
	220	32.399	36928.7			220	36.047	24341.1			220	35.864	4574
	221	32.576	27352.7			221	36.092	13851.1			221	36.04	22799.4
	222	32.666	18767.1			222	36.215	38158.5			222	36.216	29033.2
	223	32.704	8924.1			223	36.404	28040.1	Alkene		223	36.401	20273.8	Alkene
	224	32.762	20014.6			224	36.57	19355.7	C28 aldehyde		224	36.566	17966.2	C28 aldehyde
	225	32.82	9947.6			225	36.709	10413.9			225	36.698	4936.4
	226	32.933	38822			226	36.83	9163.6			226	36.817	2977.8
	227	33.045	40904.7			227	36.989	35365.1	Fatty acids		227	36.994	35604.1	Fatty acids
	228	33.173	22615.4			228	37.168	10644.6			228	37.182	5120.6
	229	33.262	26187.9			229	37.279	2966.9			229	37.321	4153.9
	230	33.381	47366.1	C26 alcohol		230	37.311	3756.7			230	37.389	6600.2
	231	33.583	25266.9			231	37.375	11408.1			231	37.575	5665.1
	232	33.621	20563.8			232	37.522	3910.7			232	37.678	6025.3
	233	33.733	28844.1			233	37.578	5666.4			233	37.887	11282.1
	234	33.9	67104.3	C27 Alkane		234	37.686	11558.1			234	38.08	72554.7	C28 alcohol
	235	34.064	17600.7			235	37.876	20125.7			235	38.303	10307.7
	236	34.103	12109.5			236	38.073	48874.7	C28 alcohol		236	38.493	79465.1	C29 Alkane
	237	34.246	129902	Fatty acidsEster		237	38.296	12901.5			237	38.605	4417.8
	238	34.468	65898.1			238	38.488	52904.7	C29 Alkane		238	38.717	1446.7
	239	34.66	23163			239	38.607	8301.7			239	38.863	5865.6
	240	34.735	24717.8			240	38.727	2823.2			240	39.027	8947.9
	241	34.96	59456.6			241	38.767	2906.3			241	39.231	5264.1
	242	35.135	27778.2			242	38.858	6919.2			242	39.411	1915.4
	243	35.284	42991.8	Primary alcohols		243	39.028	12526.4			243	39.626	71223.8	Primary alcohols
	244	35.459	25308.3			244	39.243	10034.2			244	39.738	11731
	245	35.69	44374.2	Fatty acidsEster		245	39.425	5644.3			245	39.936	4956.1
	246	35.816	10581.7			246	39.572	23913.9	Primary alcohols		246	40.037	1395.3
	247	35.898	5085.8			247	39.735	15525.9			247	40.135	2989
	248	36.088	41795.8			248	39.907	6946.4			248	40.319	2154.8
	249	36.216	46666.9			249	40.018	2624.3			249	40.392	1061.6
	250	36.408	31925.9	Alkene		250	40.138	5043.7			250	40.502	32212.5
	251	36.575	24181.5	C28 aldehyde		251	40.286	2810.8			251	40.701	16468.8
	252	36.723	13169.8			252	40.331	2217.4			252	40.901	20330.6
	253	36.794	4496.7			253	40.401	1620.4			253	41.125	13273.5	C30 aldehyde
	254	36.868	7689.7			254	40.504	33635.6			254	41.427	89721.4	Fatty acids
	255	36.998	52246.5	Fatty acids		255	40.701	17590.9			255	41.774	5710.9
	256	37.158	9749.4			256	40.898	26211.6			256	41.986	3528.5
	257	37.228	3303.1			257	41.117	11005.9	C30 aldehyde		257	42.162	8302.8
	258	37.265	7822			258	41.271	3276.8			258	42.304	7844.4
	259	37.39	14945.4			259	41.415	22827.2	Fatty acids		259	42.557	304841	C30 alcohol
	260	37.508	7553.2			260	41.58	2740.2			260	42.866	56577.7	C31 Alkane
	261	37.564	7289			261	41.8	2045.7			261	43.167	16047.7
	262	37.663	12441.4			262	41.975	7203.1			262	43.316	4088
	263	37.889	21637.8			263	42.159	5542.8			263	43.503	24142.2
	264	38.059	83084.5	C28 alcohol		264	42.214	2008.5			264	43.74	3886
	265	38.315	19862.8			265	42.296	6636.4			265	43.918	246849
	266	38.492	72509.6	C29 Alkane		266	42.547	162277	C30 alcohol		266	44.173	8154	Primary alcohols
	267	38.625	9301			267	42.86	32563.1	C31 Alkane		267	44.296	6914.5	Fatty acidsEster
	268	38.725	5536.5			268	43.149	24639.3			268	44.507	4083.5
	269	38.877	10341.3			269	43.293	2617.3			269	44.965	10159.9
	270	39.031	13720.6			270	43.493	19135.7			270	45.12	8066.9
	271	39.127	1854			271	43.672	1449.4			271	45.262	9590.3
	272	39.232	11048			272	43.892	22374.1			272	45.451	8942.7	C32 aldehyde
	273	39.337	1470.1			273	43.957	12454.1			273	45.627	74173.4	Fatty acidsEster
	274	39.428	5659			274	44.161	6751.7	Primary alcohols		274	45.942	10420.8
	275	39.62	69395.4	Primary alcohols		275	44.291	2983.4	Fatty acidsEster		275	46.32	6483.1
	276	39.733	15794.6			276	44.503	3040.9			276	46.465	54322.6
	277	39.933	10134.2			277	44.964	9872.4			277	46.805	285598	C32 alcohol
	278	40.132	9296.1			278	45.112	3380.8			278	47.26	8998.8
	279	40.243	1747.1			279	45.237	10148.9			279	47.504	10294.5
	280	40.314	3847.1			280	45.36	2179.4			280	47.615	5241.7
	281	40.368	3228			281	45.448	3534.8	C32 aldehyde		281	47.729	23513.1
	282	40.506	41861.7			282	45.618	10394.1	Fatty acidsEster		282	47.956	203674	Primary alcohols
	283	40.702	22176			283	45.94	2124.2			283	48.164	1447.7
	284	40.893	24148.4			284	46.155	1685.7			284	48.401	47465	Fatty acidsEster
	285	41.124	12348.1	C30 aldehyde		285	46.314	3571			285	48.948	8688.7
	286	41.275	4097.8			286	46.438	73553.1			286	49.102	8972.5
	287	41.422	85035.3	Fatty acids		287	46.81	129528	C32 alcohol		287	49.214	4839.4
	288	41.554	2588.6			288	46.99	20730.5			288	49.424	1962.3
	289	41.782	4990			289	47.269	7179.8			289	49.585	18876.3	Fatty acidsEster
	290	41.98	6660.7			290	47.492	6682.2			290	49.879	2681.7
	291	42.158	8550.5			291	47.721	8094.6			291	49.952	1754.5
	292	42.309	8629.1			292	47.941	38318.1	Primary alcohols		292	50.103	1038.7
	293	42.541	272538	C30 alcohol		293	48.15	1758.8			293	50.34	4866.6
	294	42.863	46804.4	C31 Alkane		294	48.389	25838.8	Fatty acidsEster		294	50.432	14548
	295	43.156	27775.3			295	48.932	5309.9			295	50.588	15622.4	Ether
	296	43.314	2917.6			296	49.102	12104.7			296	50.843	97546.2	C35 Alkane
	297	43.498	26933.6			297	49.429	1454			297	51.213	11927
	298	43.71	3336.6			298	49.568	4476.8	Fatty acidsEster		298	51.395	10255.4
	299	43.913	139330			299	49.953	1683.2			299	51.485	19143.8
	300	44.166	12094.6	Primary alcohols		300	50.334	3538.3			300	51.607	5161.2
	301	44.296	5354.7	Fatty acidsEster		301	50.436	7582.7			301	51.773	67925.4
	302	44.514	3917.1			302	50.58	5477.9	Ether		302	51.905	1075.9
	303	44.964	11547.5			303	50.667	2327.1			303	51.949	1436.9
	304	45.125	6479.5			304	50.853	22060.5	C35 Alkane		304	52.116	4005.1
	305	45.229	14047.4			305	51.053	1509.2			305	52.247	103958	Fatty acidsEster
	306	45.371	1522.4			306	51.091	1858.8			306	52.389	40301
	307	45.458	5710.6	C32 aldehyde		307	51.224	5846.8			307	53.097	16083.4
	308	45.618	37613.3	Fatty acidsEster		308	51.388	12775.2			308	53.277	1067.6
	309	45.938	6189.6			309	51.773	17283.4			309	53.349	2032
	310	46.178	1280.2			310	51.925	1967.1			310	53.91	1797.6
	311	46.317	5061.7			311	52.24	120494	Fatty acidsEster		311	54.134	3201.1
	312	46.437	105930			312	52.379	17392			312	54.356	39605.9
	313	46.79	218784	C32 alcohol		313	53.024	3820.8			313	54.705	10245	C37 Alkane Alkane
	314	46.993	15522.3			314	53.108	5331.7			314	54.845	4606.8
	315	47.093	9776.3			315	53.27	1107.7			315	55.028	14789.8
	316	47.249	8066.4			316	53.542	1075.1			316	55.144	37194
	317	47.364	1847.2			317	53.918	1881.7			317	55.399	21978.5
	318	47.484	9746.8			318	54.133	3258.7			318	55.619	18461.3
	319	47.617	4351			319	54.261	3783.7			319	55.767	2304.9
	320	47.729	22573			320	54.303	2184.4			320	55.944	2775
	321	47.94	116166	Primary alcohols		321	54.336	2541.9			321	56.042	2005	Fatty acidsEster
	322	48.169	3320.1			322	54.377	2792.3			322	56.211	37228.8
	323	48.393	48733.5	Fatty acidsEster		323	54.429	2135.5			323	56.816	2974.5
	324	48.964	7712			324	54.485	1562.2			324	56.975	4117.5
	325	49.09	13061.3			325	54.515	4020.5	C37 Alkane Alkane		325	57.126	11426
	326	49.207	3322.7			326	54.712	6206.8			326	58.027	5160.3	Fatty acidsEster
	327	49.434	1855.8			327	54.822	5637			327	58.202	7952.7
	328	49.58	9425.1	Fatty acidsEster		328	54.965	2669.3			328	58.252	6706.8
	329	49.86	1512.3			329	55.024	2051.2			329	58.391	4770.5
	330	49.965	2129.4			330	55.128	15374.4			330	58.422	3125.3
	331	50.103	1115.8			331	55.397	14310.2			331	58.515	12325.6
	332	50.333	4733.4			332	55.612	16894.4			332	58.738	6762
	333	50.428	11163.2			333	55.937	1703.3			333	59.089	24011.9
	334	50.579	14573.6	Ether		334	56.042	1731.8	Fatty acidsEster		334	59.245	15381.2
	335	50.812	49367.6	C35 Alkane		335	56.214	15651.7			335	59.463	54971.5
	336	51.102	1724			336	56.821	2250.7			336	60.239	1720.4
	337	51.208	6942			337	56.958	4907.5			337	60.428	5228.5
	338	51.401	7517.2			338	57.123	13989.6			338	60.75	9561.9
	339	51.482	10242.6			339	58.018	5490.1	Fatty acidsEster		339	61.315	5378.7
	340	51.601	3920.6			340	58.182	6985.7			340	61.764	1182.5
	341	51.769	36854.7			341	58.325	1243.4			341	62.056	7096
	342	51.872	4645.3			342	58.386	1982.4			342	63.246	2927.9
	343	52.237	116013	Fatty acidsEster		343	58.502	7530.3			343	63.713	1162.8
	344	52.383	35212.6			344	58.73	7136.5			344	64.089	1517.1
	345	52.779	1133.5			345	58.955	3508.3			345	64.151	1756
	346	53.107	15821.9			346	59.069	5396.9			346	64.343	5348.4
	347	53.298	1284			347	59.262	5146.6			347	64.568	2288.6
	348	53.532	1179			348	59.464	34355.9			348	64.677	1009.2
	349	53.913	1178.1			349	59.688	11119.2			349	64.833	3733.3
	350	54.341	32935.2			350	60.443	1710.7			350	65.083	15274.5
	351	54.527	2983.6	C37 Alkane Alkane		351	60.751	3535.4			351	65.564	1743.2
	352	54.693	8921.8			352	61.323	2950.1			352	66.45	7855
	353	54.828	4994			353	62.057	4416.3			353	66.751	3459.3
	354	55.021	12444.5			354	63.245	3120.8			354	69.757	7381.9
	355	55.141	32205.2			355	64.137	4499.2
	356	55.404	16547.2			356	64.818	3706
	357	55.613	21926.1			357	65.074	7861.1
	358	55.798	2122.2			358	65.358	1228.6
	359	55.953	1863.3			359	65.414	1327.3
	360	56.038	1647.7	Fatty acidsEster		360	65.526	3916.6
	361	56.211	27794.3			361	66.474	3856.3
	362	56.817	1519.4			362	69.395	1760.8
	363	56.963	4565.8			363	69.723	5533.3
	364	57.061	2296.1
	365	57.124	6839.1
	366	58.029	5805.8	Fatty acidsEster
	367	58.192	13599.6
	368	58.358	4254.8
	369	58.393	3748.3
	370	58.512	9708.1
	371	58.71	6416.7
	372	59.075	19032.4
	373	59.241	10443.4
	374	59.453	34502.1
	375	60.219	2099.5
	376	60.407	5072.9
	377	60.746	8328.5
	378	61.319	5613.5
	379	61.754	1329.6
	380	62.049	6218.1
	381	63.222	3999.8
	382	63.735	3036.3
	383	64.094	1592.3
	384	64.16	2304.7
	385	64.322	5051.2
	386	64.562	1934.2
	387	64.828	3103.6
	388	65.093	13479.1
	389	65.391	2200
	390	65.495	2114.2
	391	66.454	6208.7
	392	69.428	2113.9
	393	69.725	7626.7

## Sheet: LD
Supplemental Table S12. (B) Cuticular wax composition analysis of LD leaves
LD1	Peak#	RT (min)	Area	Compound	LD2	Peak#	RT (min)	Area	Compound	LD3	Peak#	RT (min)	Area	Compound
	1	5.052	1206.5			1	5.055	3424.7			1	5.052	2389.4
	2	5.088	1063.3			2	5.333	1872	C11 Alkane		2	5.332	1230.5	C11 Alkane
	3	5.333	1362.6	C11 Alkane		3	5.48	8367.9			3	5.471	4662.6
	4	6.478	1679.9			4	5.992	1411.7			4	5.993	1346.4
	5	6.634	1570.9			5	6.072	3583			5	6.07	2356.5
	6	7.267	4549.9	Fatty acids		6	6.172	1139.4			6	6.475	2043
	7	7.464	9195.7			7	6.477	1897.1			7	6.631	1793.6
	8	7.713	1236			8	6.63	2160.6			8	7.265	3793.2	Fatty acids
	9	7.83	3556.4			9	7.267	4737.4	Fatty acids		9	7.466	5215
	10	7.949	1173.1			10	7.466	7703.9			10	7.71	1424.4
	11	8.148	1438.5	C13 Alkane		11	7.691	4051.4			11	7.758	1213
	12	8.449	3405.8			12	7.758	2183.5			12	7.829	3900.9
	13	9.253	1203.8			13	7.829	6082.4			13	7.947	1207.5
	14	9.547	4306.4	Ester		14	7.947	1930.5			14	8.034	1270.9	C13 Alkane
	15	9.684	3484			15	8.035	2097	C13 Alkane		15	8.147	1095.3
	16	9.859	2088.2			16	8.147	1589.3			16	8.448	3006.9
	17	10.045	7928			17	8.448	3822.1			17	8.581	1167.1
	18	10.25	1172.5			18	8.582	1451.5			18	8.756	2575.5
	19	10.453	1260.4	Ester		19	8.626	1228.3			19	8.857	1009.8
	20	10.576	2318.8			20	8.757	3941.8			20	9.248	1567
	21	10.652	14628.5			21	8.858	1338.7			21	9.411	1123.5
	22	10.717	1732.1	C15Alkane		22	9.25	1877.4			22	9.545	5189.9	Ester
	23	10.762	3886.2			23	9.411	1447.1			23	9.681	4742.4
	24	10.886	1195.6			24	9.546	5501.6	Ester		24	9.853	3142.2
	25	10.951	1189.8			25	9.682	4297.8			25	10.043	8357.1
	26	11.089	1840.1			26	9.778	1014			26	10.243	1467
	27	11.219	2901.7	Fatty acids		27	9.852	3818.3			27	10.453	1420.6	Ester
	28	11.266	1734.1			28	10.044	8877.7			28	10.574	1949.8
	29	11.33	24417	Ester		29	10.246	1615			29	10.651	14190.6
	30	11.448	2817			30	10.453	1329.3	Ester		30	10.717	1730.1	C15Alkane
	31	11.554	2160.9			31	10.575	1823.8			31	10.761	2579.3
	32	11.62	1790.9			32	10.652	15286.9			32	10.81	1101.6
	33	11.721	1696.9			33	10.716	1981.3	C15Alkane		33	10.886	1998.4
	34	11.766	1439.7			34	10.761	4468.8			34	10.95	1608
	35	11.856	3177.4			35	10.886	1394.5			35	11.088	1785.8
	36	11.916	1942.7			36	10.95	1939.8			36	11.217	2405.8	Fatty acids
	37	11.976	5701.2			37	11.087	2962			37	11.265	1715.5
	38	12.09	2915.2			38	11.217	3643.3	Fatty acids		38	11.33	25242.2	Ester
	39	12.191	2461.3			39	11.266	1773.6			39	11.449	2769.9
	40	12.328	1714.9			40	11.33	26095.1	Ester		40	11.557	1963
	41	12.466	3234.3			41	11.45	2913.4			41	11.614	2465.1
	42	12.541	2798.7			42	11.552	1961			42	11.706	1684.6
	43	12.63	9961	Ester		43	11.609	2745.5			43	11.765	1586.2
	44	12.718	2854			44	11.718	1943.8			44	11.855	1727.7
	45	12.751	3570.8			45	11.766	1568.5			45	11.914	2522.5
	46	12.841	3153.9			46	11.858	3740.2			46	11.977	5762.9
	47	12.877	2803.3			47	11.916	1396			47	12.089	5898.3
	48	12.946	6207.3			48	11.976	6261.6			48	12.328	1609.2
	49	13.051	3080.9			49	12.093	4170			49	12.467	3005.5
	50	13.108	3635.5			50	12.186	1638.3			50	12.542	2857
	51	13.18	10361.3	C17 Alkane		51	12.332	1582.6			51	12.63	10418.1	Ester
	52	13.305	6634.7			52	12.465	2945.9			52	12.714	2198.2
	53	13.432	10817			53	12.539	2986			53	12.752	3807.6
	54	13.546	4191.3			54	12.631	10006.9	Ester		54	12.877	5411.1
	55	13.667	12856	Fatty acids		55	12.712	3451.5			55	12.947	5767.1
	56	13.776	6717.9			56	12.752	3310.3			56	13.052	2759.9
	57	13.869	6700.5			57	12.832	8426			57	13.102	3765.5
	58	13.981	14831.8			58	12.946	6788.8			58	13.181	9867.9	C17 Alkane
	59	14.117	6198			59	13.052	2516.2			59	13.306	6093.6
	60	14.581	3.67562e+06			60	13.105	4335.9			60	13.376	1856.9
	61	14.722	14522.1			61	13.181	11029.3	C17 Alkane		61	13.433	8462.9
	62	14.79	5097.6			62	13.304	6467.8			62	13.546	3591.6
	63	14.856	6114.9			63	13.433	11012.9			63	13.664	10766.7	Fatty acids
	64	14.95	16285.2	Ester		64	13.545	3962			64	13.776	6835.5
	65	15.016	9888.6			65	13.668	15814.4	Fatty acids		65	13.865	6216.9
	66	15.075	8038.2			66	13.777	6389.9			66	13.983	14615.3
	67	15.172	6783.5			67	13.864	6740.2			67	14.117	5176.3
	68	15.24	11295.4			68	13.982	15000.2			68	14.613	4.2841e+06
	69	15.315	6356.9			69	14.118	5770.6			69	14.953	7902.6	Ester
	70	15.448	19557			70	14.644	4.89235e+06			70	15.019	4425.6
	71	15.514	10732			71	14.958	7741.3	Ester		71	15.171	1653.2
	72	15.651	18877.4			72	15.023	3787.9			72	15.45	3822.6
	73	15.752	20042.8			73	15.083	1545			73	15.511	1095.8
	74	15.822	8823.2			74	15.168	2112			74	15.607	1635.3
	75	15.943	18872.2			75	15.45	4346.9			75	15.65	1825.9
	76	16.109	29362.4	C19 Alkane		76	15.516	1181.7			76	15.755	6472.1
	77	16.251	30169.5	Ester		77	15.607	1615.2			77	15.944	1131.4
	78	16.436	339209	Ester		78	15.653	2100.8			78	16.108	4390.1	C19 Alkane
	79	16.536	16348			79	15.757	7135			79	16.252	5616.5	Ester
	80	16.612	7616			80	15.949	1294.7			80	16.435	306188	Ester
	81	16.833	398235	Fatty acids		81	16.11	4280.4	C19 Alkane		81	16.836	379661	Fatty acids
	82	16.98	21353.8			82	16.251	5467.2	Ester		82	16.986	33920.3
	83	17.04	19190.3			83	16.434	275092	Ester		83	17.122	19444.2
	84	17.121	20855.8			84	16.551	21721.1			84	17.22	18153.1
	85	17.218	24262.2			85	16.842	421456	Fatty acids		85	17.278	11853.3
	86	17.291	11255			86	16.987	33386.8			86	17.38	23064.8
	87	17.381	26378.4			87	17.065	14663.8			87	17.473	33535
	88	17.472	35535.4			88	17.127	20794.6			88	17.6	31519
	89	17.599	37007.8			89	17.223	16937.2			89	17.739	32354.3
	90	17.748	38176.9			90	17.274	15463.5			90	17.833	14452.8
	91	17.834	14121.1			91	17.378	25775.9			91	17.914	30037.1
	92	17.912	32366.1			92	17.474	33513.2			92	17.98	18254.3
	93	17.984	24740.3			93	17.587	49187.4			93	18.098	28718.3
	94	18.098	34056.1			94	17.745	32316.7			94	18.227	35921.8
	95	18.226	35236.7			95	17.83	13748.8			95	18.312	21018.8
	96	18.297	23864.9			96	17.912	36934.4			96	18.354	10279.3
	97	18.346	21695			97	17.984	21623.3			97	18.502	63403.1
	98	18.493	62959.7			98	18.105	33647.7			98	18.695	106260	Fatty acids
	99	18.602	13591.5			99	18.22	36300			99	18.829	31404.9
	100	18.693	101282	Fatty acids		100	18.29	27637.1			100	18.923	36072.8
	101	18.828	37005			101	18.365	11337.8			101	19.017	13736.7
	102	18.926	38300.1			102	18.495	67095.9			102	19.055	9679
	103	19.06	29819			103	18.694	118575	Fatty acids		103	19.102	15762.7
	104	19.096	11355.2			104	18.822	40620.2			104	19.129	13097.3
	105	19.14	14933.6			105	18.927	38400.9			105	19.193	25640.9
	106	19.189	22446.2			106	19.111	43606.1			106	19.307	36314.2	Ether
	107	19.263	27776.8	Ether		107	19.14	9681.5			107	19.363	40820.3
	108	19.301	25944.5			108	19.193	28354.2			108	19.527	31122.6
	109	19.363	38832.7			109	19.282	43500.1	Ether		109	19.568	33270.3
	110	19.519	77937.1			110	19.393	40139.9			110	19.716	28891.6
	111	19.717	39597			111	19.52	73061.9			111	19.912	72891.3	C21 Alkane
	112	19.9	74873.4	C21 Alkane		112	19.706	40464.1			112	20.003	110861
	113	20.006	140472			113	19.807	24563.2			113	20.185	106435
	114	20.189	192699			114	19.904	51334.8	C21 Alkane		114	20.316	62183.6
	115	20.495	46295.6			115	20.011	114915			115	20.451	13200.7
	116	20.654	67400.9			116	20.08	39217			116	20.488	31507.1
	117	20.814	414899	Fatty acids		117	20.189	188459			117	20.653	64046.7
	118	21.015	76881.9			118	20.446	12799.1			118	20.814	375698	Fatty acids
	119	21.111	18078.4			119	20.489	27572.2			119	21.027	78014.6
	120	21.195	60148.7			120	20.535	22548.3			120	21.19	66226.7
	121	21.302	46493			121	20.659	64917.2			121	21.294	35377.7
	122	21.417	44045			122	20.82	418424	Fatty acids		122	21.458	57614.1
	123	21.467	20453.5			123	21.027	77664.6			123	21.517	45451.3
	124	21.514	35176.8			124	21.121	13302.3			124	21.637	57923
	125	21.571	16062.6			125	21.205	61187.1			125	21.789	49430.5
	126	21.631	51801.4			126	21.284	37534.5			126	21.919	126245	Fatty acids
	127	21.705	20034.3			127	21.419	47775			127	22.099	56437.6
	128	21.791	49041.3			128	21.526	62513.7			128	22.23	113900	Ester
	129	21.915	101906	Fatty acids		129	21.634	69033.3			129	22.304	53749.4
	130	21.985	28589.6			130	21.725	20203.3			130	22.397	43654.4
	131	22.093	67587.3			131	21.787	27838			131	22.55	90288.3
	132	22.237	231326	Ester		132	21.917	156440	Fatty acids		132	22.71	59464.5
	133	22.443	17095.7			133	22.095	58451.5			133	22.813	32067.2
	134	22.557	117101			134	22.239	245900	Ester		134	22.973	145896	Fatty acids
	135	22.727	48184.2			135	22.554	101231			135	23.243	77486.2
	136	22.788	43561.4			136	22.651	28214			136	23.419	69912.9
	137	22.964	167292	Fatty acids		137	22.691	16656.1			137	23.572	42855.5
	138	23.213	49649.3			138	22.751	33674.3			138	23.674	66546
	139	23.266	43124			139	22.789	28563.4			139	23.798	52863.9
	140	23.415	81607.3			140	22.854	21486.4			140	23.945	38655.2
	141	23.508	15247.8			141	22.969	132438	Fatty acids		141	24.031	57026.2
	142	23.554	29204.9			142	23.12	8644.3			142	24.18	104942
	143	23.615	22745			143	23.223	50919.2			143	24.396	91529.4	C23 Alkane
	144	23.678	54664.4			144	23.26	40345.8			144	24.517	16316.1
	145	23.783	49533.9			145	23.335	13081.9			145	24.639	98846.7
	146	23.907	37165.9			146	23.424	76191			146	24.75	29929.6
	147	23.942	15515			147	23.552	48616.2			147	24.881	100741
	148	24.002	27684.7			148	23.67	72296.8			148	25.043	13930.6
	149	24.031	25481.4			149	23.782	17837			149	25.098	18986.4
	150	24.089	20166.5			150	23.807	43677.6			150	25.141	27153.2
	151	24.177	79530.5			151	23.981	53337.5			151	25.244	25571.2
	152	24.26	24824.8			152	24.021	52122			152	25.347	61521.6
	153	24.393	121531	C23 Alkane		153	24.181	111315			153	25.451	58458
	154	24.549	23184.5			154	24.398	113641	C23 Alkane		154	25.583	25002.2
	155	24.642	86852.8			155	24.641	119887			155	25.624	29885.3
	156	24.744	22379.8			156	24.789	45468.6			156	25.882	554743
	157	24.796	29303.9			157	24.885	92235.5			157	26.025	48706.2
	158	24.885	51427.4			158	25.01	18322			158	26.135	44666.5
	159	24.942	42698.5			159	25.052	25844.1			159	26.288	125535
	160	25.058	40048.1			160	25.129	40666			160	26.579	74145.6	Fatty acids
	161	25.141	23372.8			161	25.23	28829.6			161	26.782	440167
	162	25.192	11799.9			162	25.346	71835.1			162	27.037	95044.5	Ester
	163	25.23	25335.5			163	25.452	64938.7			163	27.236	25380.1
	164	25.352	76833.8			164	25.602	26441.2			164	27.347	69006.6
	165	25.45	62022.1			165	25.63	18817.1			165	27.456	16718.3
	166	25.609	38552.7			166	25.893	697690			166	27.524	14913.2
	167	25.662	20912.6			167	26.022	52281.9			167	27.566	15016.5
	168	25.89	768742			168	26.129	49265.6			168	27.616	42467.9	Ester
	169	26.017	48453			169	26.284	109618			169	27.739	10398.5
	170	26.125	52864.1			170	26.426	25374.4			170	27.805	21125.5
	171	26.284	133733			171	26.589	93474.1	Fatty acids		171	27.838	25936
	172	26.586	97195.1	Fatty acids		172	26.781	433899			172	27.92	18901.8
	173	26.78	454306			173	27.033	89680.4	Ester		173	27.976	12890.2
	174	27.025	97384	Ester		174	27.164	25510.6			174	28.039	24953.7
	175	27.151	40912			175	27.254	23242.2			175	28.124	52672.7
	176	27.249	22023.6			176	27.349	101726			176	28.285	37649.2
	177	27.349	70709.4			177	27.532	15140.6			177	28.408	33700
	178	27.443	28909.4			178	27.586	20465.3			178	28.571	73706.7
	179	27.522	15744.1			179	27.632	20670.3	Ester		179	28.699	37615.8	Primary alcohols
	180	27.581	22969.6			180	27.692	18584.4			180	28.822	32757.9
	181	27.635	25077.5	Ester		181	27.735	13329.7			181	28.936	64295.1
	182	27.684	13923.2			182	27.808	36213.8			182	29.235	938994	C25 Alkane
	183	27.731	18890			183	27.871	13713.9			183	29.588	9168.5
	184	27.796	21209.8			184	27.908	27957.5			184	29.991	1403.8
	185	27.83	42481.4			185	28.038	41202.8			185	30.063	4690.4
	186	27.944	20087.2			186	28.113	39282.6			186	30.159	2753.7
	187	28.044	28318.4			187	28.213	21829.3			187	30.22	7535.1
	188	28.112	42402.2			188	28.275	29752.3			188	30.377	2807.5
	189	28.179	25657.1			189	28.391	46211.4			189	30.463	1135.3
	190	28.282	36642.5			190	28.552	86421.6			190	30.507	1054.2
	191	28.368	16940			191	28.7	46052.2	Primary alcohols		191	30.565	1149.8
	192	28.402	23967.5			192	28.821	35902.6			192	30.687	5676.9
	193	28.539	91767.1			193	28.936	66945.5			193	30.907	2607.6
	194	28.69	57873.9	Primary alcohols		194	29.232	535980	C25 Alkane		194	30.991	3014.7
	195	28.82	29273.6			195	29.604	66311.8			195	31.119	5764.6
	196	28.939	64896.6			196	29.737	18618.2			196	31.335	1312.5
	197	29.228	1.0417e+06	C25 Alkane		197	29.777	14617.2			197	31.541	89248.9
	198	29.596	7619			198	29.854	18650			198	31.704	21770.2
	199	29.908	1687.3			199	29.897	19243.6			199	31.802	33559	C26 aldehyde
	200	30.046	5341.2			200	30.062	50264.9			200	31.913	14989.4
	201	30.165	15501.2			201	30.165	37342.1			201	32.029	22905.1
	202	30.338	1980.8			202	30.241	34287.6			202	32.141	16528.2
	203	30.395	1133.3			203	30.351	32335.8			203	32.252	18084.1
	204	30.462	1089.8			204	30.483	24396.8			204	32.304	15258
	205	30.505	2425.8			205	30.531	13275.5			205	32.354	10409.6
	206	30.681	5113.6			206	30.684	64040.8			206	32.393	26872.4
	207	30.751	1002.7			207	30.802	8777.6			207	32.54	8908
	208	30.86	1065.9			208	30.85	14064.5			208	32.575	6584.5
	209	30.915	1585.2			209	30.906	25227.9			209	32.683	19808.7
	210	31.022	3105.3			210	31.009	26006.8			210	32.746	21647
	211	31.13	4674			211	31.123	46226			211	32.929	30493.3
	212	31.326	1017.5			212	31.214	25014.7			212	33.06	31435.9
	213	31.534	81945.2			213	31.363	32414.8			213	33.192	14555
	214	31.642	8098.9			214	31.54	93139.8			214	33.282	25411.3
	215	31.742	30239.2			215	31.693	18342.9			215	33.417	42188.7	C26 alcohol
	216	31.81	15567.3	C26 aldehyde		216	31.732	12894.9			216	33.593	31908.9
	217	31.852	10720.6			217	31.81	30899.8	C26 aldehyde		217	33.759	25692.3
	218	31.892	18054.7			218	31.942	26293			218	33.906	70163.9	C27 Alkane
	219	31.993	23552			219	32.02	7707.1			219	34.081	18404.5
	220	32.095	21420.4			220	32.054	19018.9			220	34.257	128741	Ester
	221	32.37	96456.1			221	32.132	7179.2			221	34.471	53482.2
	222	32.601	24429.7			222	32.25	35607.6			222	34.586	5550.7
	223	32.678	14911			223	32.355	58911			223	34.696	30451
	224	32.739	28263.4			224	32.542	11520.7			224	34.858	7329.4
	225	32.915	40100.6			225	32.675	24261			225	34.971	30126.4
	226	33.057	34163.5			226	32.748	25919.1			226	35.136	25827
	227	33.209	19545.4			227	32.938	33842.1			227	35.295	19476.8	Primary alcohols
	228	33.263	21863.8			228	33.052	39299.4			228	35.369	9458.9
	229	33.381	49335.8	C26 alcohol		229	33.2	18977.6			229	35.473	23878.2
	230	33.585	38287.1			230	33.25	30441.7			230	35.684	36671.4	Ester
	231	33.754	31413.2			231	33.4	53259	C26 alcohol		231	35.846	5031.7
	232	33.896	56127.6	C27 Alkane		232	33.576	19690			232	35.981	10558.6
	233	34.042	16209.3			233	33.626	16132.1			233	36.036	6530.9
	234	34.098	8490.5			234	33.763	35947			234	36.093	12007.5
	235	34.248	136211	Ester		235	33.904	79010.5	C27 Alkane		235	36.225	50327.3
	236	34.47	70928			236	34.08	13592.4			236	36.408	28771.2	Alkene
	237	34.586	8575.2			237	34.109	7483.2			237	36.581	14430.6	C28 aldehyde
	238	34.688	30268.4			238	34.255	135422	Ester		238	36.734	9464.8
	239	34.796	5955.8			239	34.472	46680.4			239	36.852	6461.8
	240	34.852	10097.4			240	34.6	10952.8			240	37.003	46403.9	Fatty acids
	241	34.952	47592			241	34.705	30328.3			241	37.182	8009.7
	242	35.136	29399.4			242	34.848	8781.6			242	37.286	3760.9
	243	35.277	26873.1	Primary alcohols		243	34.963	43170.3			243	37.386	13343.4
	244	35.384	7407.7			244	35.139	34620.5			244	37.572	9627.3
	245	35.459	27224.1			245	35.298	23080.3	Primary alcohols		245	37.686	8915.2
	246	35.68	35013.1	Ester		246	35.477	61536.3			246	37.885	16298.3
	247	35.8	6643.7			247	35.697	52398.7	Ester		247	38.098	129236	C28 alcohol
	248	35.856	4092.1			248	35.978	11192.6			248	38.312	12738.2
	249	35.974	14454.3			249	36.093	26082.9			249	38.498	122556	C29 Alkane
	250	36.039	11223.1			250	36.22	53179.1			250	38.731	2491.1
	251	36.085	13319.7			251	36.409	39356.1	Alkene		251	38.812	2663.5
	252	36.216	35050			252	36.576	18611.8	C28 aldehyde		252	38.875	5898.2
	253	36.4	30688.7	Alkene		253	36.725	9629.1			253	39.042	9828.2
	254	36.567	17556.7	C28 aldehyde		254	36.778	3359.4			254	39.232	11050.6
	255	36.717	10158.8			255	36.839	6703.8			255	39.346	1609.1
	256	36.995	66991.2	Fatty acids		256	37.002	70910.3	Fatty acids		256	39.408	4056
	257	37.15	9952.1			257	37.186	9871.5			257	39.639	73338.1	Primary alcohols
	258	37.251	1770.6			258	37.382	37490.7			258	39.739	8037.6
	259	37.293	3624.4			259	37.573	10013.3			259	39.813	4075.1
	260	37.371	16712.3			260	37.674	12565.4			260	39.954	16242.8
	261	37.503	2623.5			261	37.892	20163.9			261	40.145	6417.7
	262	37.573	6878.3			262	38.082	164724	C28 alcohol		262	40.386	9478.8
	263	37.678	10420.2			263	38.329	15087.2			263	40.517	36637.4
	264	37.872	16498.7			264	38.503	136234	C29 Alkane		264	40.711	32568.8
	265	38.063	125109	C28 alcohol		265	38.768	4295.3			265	40.916	39076.1
	266	38.304	15698.6			266	38.871	10787.6			266	41.128	9250.7	C30 aldehyde
	267	38.492	92170.6	C29 Alkane		267	39.037	16132.8			267	41.273	3325.9
	268	38.728	2008.1			268	39.244	15596.7			268	41.429	78350.2	Fatty acids
	269	38.763	1813.5			269	39.408	7558.9			269	41.614	1547.1
	270	38.806	1999.4			270	39.642	117662	Primary alcohols		270	41.787	7064.4
	271	38.843	1872.5			271	39.751	15464.9			271	41.986	9663.3
	272	38.882	3168.6			272	39.953	16361.5			272	42.163	8435.3
	273	39.034	11375.3			273	40.07	1985.8			273	42.314	13419.9
	274	39.232	11465.4			274	40.153	10245.4			274	42.58	483272	C30 alcohol
	275	39.328	1767.4			275	40.39	13477			275	42.88	74465.1	C31 Alkane
	276	39.387	3336.3			276	40.52	47578.2			276	43.178	23015.6
	277	39.44	1247.1			277	40.708	34354.7			277	43.308	5124.5
	278	39.622	89909.5	Primary alcohols		278	40.914	45525.9			278	43.511	32873.8
	279	39.734	12077.4			279	41.139	13231.9	C30 aldehyde		279	43.749	8881.4
	280	39.831	2752.2			280	41.433	123952	Fatty acids		280	43.927	209290
	281	39.946	15227.4			281	41.582	1692.1			281	44.184	46129.4	Primary alcohols
	282	40.134	6324.9			282	41.619	2167			282	44.309	15060.3	Ester
	283	40.365	8600.9			283	41.783	12283.2			283	44.473	3068.1
	284	40.51	46886			284	41.985	10427.4			284	44.972	18319.7
	285	40.702	17905.7			285	42.167	15801			285	45.127	4946.8
	286	40.901	29895.7			286	42.315	15895.9			286	45.271	13834.2	C32 aldehyde
	287	41.122	7137.9	C30 aldehyde		287	42.587	569817	C30 alcohol		287	45.455	3284.8
	288	41.278	3408.5			288	42.881	84486.8	C31 Alkane		288	45.63	45143.4	Ester
	289	41.423	90394.9	Fatty acids		289	43.167	42234.2			289	45.77	3474.6
	290	41.782	5991.7			290	43.523	41241			290	45.948	9012
	291	41.975	6363.2			291	43.753	8600.5			291	46.321	30684.9
	292	42.164	6137.6			292	43.936	319636			292	46.475	83009.2
	293	42.305	9314.6			293	44.179	42080	Primary alcohols		293	46.827	388555	C32 alcohol
	294	42.557	435803	C30 alcohol		294	44.315	15226.4	Ester		294	47.103	20195.9
	295	42.87	56039.1	C31 Alkane		295	44.512	7225.8			295	47.28	14112.9
	296	43.156	34135.1			296	44.639	1649.2			296	47.514	9929.5
	297	43.505	32681.2			297	44.975	23367.3			297	47.736	35295.9
	298	43.741	5318.7			298	45.116	11600.5			298	47.961	170499	Primary alcohols
	299	43.918	207614			299	45.276	16862.7			299	48.166	3945.7
	300	44.162	33876.1	Primary alcohols		300	45.464	4020.7	C32 aldehyde		300	48.421	123892	Ester
	301	44.299	12563.3	Ester		301	45.63	68461.3	Ester		301	48.899	7162
	302	44.499	2826.3			302	45.774	4450.6			302	49.002	1321.9
	303	44.969	12823.3			303	45.948	14270.6			303	49.122	13053.2
	304	45.132	4530.7			304	46.138	1026.9			304	49.272	2105
	305	45.241	16216			305	46.32	42450.9			305	49.446	2896.7
	306	45.445	2551.9	C32 aldehyde		306	46.481	72911.9			306	49.578	12259.7	Ester
	307	45.624	51140.3	Ester		307	46.823	426895	C32 alcohol		307	49.72	1690.6
	308	45.779	1814.9			308	47.098	19675.4			308	49.87	1547
	309	45.939	9379.7			309	47.283	17421.5			309	49.96	8714.5
	310	46.314	26764.4			310	47.508	18086.5			310	50.124	4435.6
	311	46.45	89208.2			311	47.738	48290			311	50.243	1159.4
	312	46.803	365219	C32 alcohol		312	47.965	225427	Primary alcohols		312	50.448	36926.8
	313	47.092	15159.1			313	48.178	8430.9			313	50.585	27418.1	Ether
	314	47.233	4272.9			314	48.419	105173	Ester		314	50.869	91451.8	C35 Alkane
	315	47.277	8181			315	48.894	12470.9			315	51.234	15727.5
	316	47.495	11730.6			316	48.995	1984.1			316	51.412	18285.7
	317	47.722	37986.1			317	49.118	19871			317	51.497	25954
	318	47.953	186042	Primary alcohols		318	49.45	3339			318	51.676	1701.5
	319	48.174	5477.3			319	49.582	16216.5	Ester		319	51.785	37823.9
	320	48.408	112323	Ester		320	49.874	2138.3			320	51.943	9113.7
	321	48.884	5919.3			321	49.962	6508.3			321	52.124	13934.5
	322	48.947	5231.5			322	50.115	3911.1			322	52.252	134007	Ester
	323	49.119	14819.2			323	50.229	1125.9			323	52.404	100282
	324	49.277	1539.5			324	50.34	7049.8			324	52.544	6207.7
	325	49.451	2526.9			325	50.448	32720.1			325	52.692	4676.5
	326	49.578	13280.9	Ester		326	50.585	30441.7	Ether		326	52.81	8080.7
	327	49.886	2025.6			327	50.717	3712.3			327	53.057	12858.8
	328	49.958	3515.3			328	50.858	108492	C35 Alkane		328	53.101	10445.2
	329	50.113	1861			329	51.235	18112.2			329	53.301	6888.1
	330	50.437	30233.6			330	51.405	22445.7			330	53.35	5224.2
	331	50.566	15305.4	Ether		331	51.498	31397.7			331	53.458	3178
	332	50.688	1925.5			332	51.784	46001.7			332	53.519	3360
	333	50.821	93122.5	C35 Alkane		333	51.952	7178.4			333	53.588	3645.8
	334	51.061	5838			334	52.138	13919.9			334	53.668	3791.3
	335	51.219	13183.3			335	52.25	119254	Ester		335	53.761	5691.4
	336	51.382	10292.9			336	52.404	91205			336	53.913	12796.4
	337	51.483	20232.3			337	52.562	2806.6			337	54.062	5599.5
	338	51.596	4003.2			338	52.642	1745.3			338	54.14	8637.3
	339	51.775	58558.9			339	52.7	1128.4			339	54.323	39227
	340	51.936	4554.9			340	52.744	1462.5			340	54.409	49960.1
	341	52.127	9163.8			341	52.786	1054.4			341	54.716	23183.6	C37 Alkane Alkane
	342	52.246	117730	Ester		342	52.835	2253.4			342	54.831	11772.2
	343	52.391	94403.5			343	53.115	23553.1			343	55.036	23554
	344	52.66	1005.9			344	53.279	2547.7			344	55.149	53142.7
	345	52.787	1568.5			345	53.343	3442.1			345	55.417	32922.8
	346	53.106	9084.9			346	53.463	1103.5			346	55.628	37058.6
	347	53.29	1699.9			347	53.516	1589.8			347	55.786	18878.1
	348	53.344	1238.2			348	53.6	1315.5			348	55.946	17656.8
	349	53.917	1915.3			349	53.722	1408.7			349	56.071	9508.8	Ester
	350	54.139	4455.3			350	53.766	1321.7			350	56.241	160880
	351	54.337	57632.7			351	53.93	5073.5			351	56.41	9724.5
	352	54.694	16711.2	C37 Alkane Alkane		352	54.1	5964.2			352	56.549	13248.9
	353	54.845	5613.5			353	54.133	3422.2			353	56.664	8064.9
	354	55.019	16555.1			354	54.372	87619.2			354	56.725	8004.3
	355	55.148	48239.6			355	54.69	7126.5	C37 Alkane Alkane		355	56.979	29891.3
	356	55.406	21156.6			356	54.723	9944.7			356	57.152	62826.5
	357	55.621	20828.1			357	54.821	3688.5			357	57.471	6769.7
	358	55.779	5536.2			358	54.863	6251.8			358	57.554	3436.9
	359	55.93	4190.6			359	55.034	19828			359	57.593	4727.3
	360	56.057	2208.1	Ester		360	55.146	58822.8			360	57.658	3435.5
	361	56.225	129346			361	55.412	23202.2			361	57.733	7540.6
	362	56.823	2090.6			362	55.543	13533			362	57.831	3827.7
	363	56.972	7917.2			363	55.629	23634			363	57.868	4613.4
	364	57.042	4700			364	55.795	9769.8			364	58.029	21329.2	Ester
	365	57.144	8709.6			365	55.947	9941.6			365	58.339	31128.7
	366	58.011	7557.7	Ester		366	56.033	7094.6	Ester		366	58.406	10971.4
	367	58.223	16949.9			367	56.235	146578			367	58.452	7664.1
	368	58.371	19138.2			368	56.384	2224.5			368	58.487	24748.5
	369	58.5	8927.1			369	56.438	3586.5			369	58.733	12881.8
	370	58.694	1829.5			370	56.52	3941.3			370	58.9	4021.8
	371	58.781	2622.2			371	56.618	4494.6			371	59.085	30524.6
	372	58.881	1498.9			372	56.695	2737.3			372	59.265	19453.6
	373	58.941	2229.4			373	56.836	6614.4			373	59.472	66550.5
	374	59.082	27812.7			374	57.014	11742.3			374	59.637	4318.8
	375	59.25	20508.5			375	57.142	26980.3			375	59.694	4406.2
	376	59.458	73629.3			376	57.383	2698.7			376	59.739	22762.5
	377	60.258	4602.9			377	58.032	8259.8	Ester		377	60.254	8672.5
	378	60.436	9230.1			378	58.228	12908.6			378	60.452	16152.5
	379	60.762	41132			379	58.282	12713.4			379	60.783	43320.7
	380	61.32	2568.4			380	58.363	3866.2			380	61.342	3282.4
	381	61.753	3450.7			381	58.418	11337.5			381	61.738	2436.5
	382	62.05	4714.1			382	58.519	19248			382	62.063	5331.9
	383	63.252	4547.3			383	58.76	4090.4			383	62.626	1540.9
	384	63.575	1387.1			384	58.96	2576.2			384	63.256	4203.7
	385	63.701	2830.3			385	59.098	23911.9			385	64.161	1908
	386	63.746	1175			386	59.267	17070.1			386	64.362	3185.1
	387	63.795	1626.4			387	59.473	75388.7			387	64.593	1126.3
	388	64.1	3388.4			388	60.253	4400.9			388	64.724	1074.6
	389	64.343	9767			389	60.46	12649.1			389	64.842	2301.7
	390	64.574	4175.9			390	60.788	41066.4			390	65.094	16244.2
	391	64.658	1861.9			391	61.325	6912			391	65.401	1318.5
	392	64.825	4136.6			392	61.74	2905			392	65.562	3264
	393	65.091	17446.5			393	62.063	10196.3			393	66.128	2682
	394	65.382	1382.7			394	62.358	1026.3			394	66.462	6890.4
	395	65.539	1426.5			395	62.636	1955.9			395	66.764	6212.1
	396	66.095	2751.3			396	63.274	4892.6			396	69.446	1148.6
	397	66.429	6741.4			397	63.646	1180.7			397	69.767	7416.7
	398	66.614	1167			398	63.769	3233.9
	399	66.777	6119			399	64.071	1047.5
	400	69.73	2520.3			400	64.15	2247.8
	401	69.778	1622.2			401	64.359	6542.8
						402	64.577	2685.4
						403	64.7	2839.3
						404	64.846	3159.6
						405	65.099	23029.3
						406	65.503	1997.3
						407	65.566	3617.7
						408	66.152	2317.4
						409	66.472	12096.3
						410	66.749	3585.2
						411	66.794	4096.4
						412	67.993	1052.3
						413	69.432	1325.8
						414	69.74	10127
